# Supplementary material for: Dietary fibers obtained from Caulerpa lentillifera prevent high-fat diet-induced obesity in mice by regulating the gut microbiota and metabolite profiles
Source: Royal Society of Chemistry journal article supplement (doi:10.1039/d2fo01632j), 2022-01-01

## Supporting information

### Supplementary tables

**Table S1** Compositions of experimental diets.

| Compositions  | Normal diet | High-fat diet |
|---------------|-------------|---------------|
| Crude fiber   | 4.90%       | 1.60%         |
| Crude protein | 20.18%      | 19.50%        |
| Crude fat     | 4.60%       | 17.20%        |
| Crude ash     | 6.60%       | 4.00%         |
| Moisture      | 10.00%      | 8.80%         |
| Calcium       | 1.14%       | 1.20%         |
| Phosphorus    | 0.91%       | 0.82%         |

**Table S2** Mobile phase and solvent gradient conditions of non-target metabolism.

| □                            | Positive ion mode                                                              |                                       | Negative ion mode                 |                                                 |
|------------------------------|--------------------------------------------------------------------------------|---------------------------------------|-----------------------------------|-------------------------------------------------|
|                              | A                                                                              | B                                     | A                                 | B                                               |
| Mobile phase                 | 0.1% formic acid<br>in water                                                   | acetonitrile with<br>0.1% formic acid | 5 mM ammonium<br>acetate in water | 5 mM ammonium acetate<br>water:acetonitrile=1:9 |
| Solvent gradient<br>(for B%) | 0-5 min: 0-20; 5-7 min: 20; 7-14 min: 20-100; 14-16 min: 100; 16-21 min: 100-0 |                                       |                                   |                                                 |

## Supplementary figures

### Figure captions

**Fig. S1** The animal experiment design.

**Fig. S2** Serum levels of ALT (A) and AST (B). Data were presented as mean  $\pm$  SEM (n=8). Significant effect compared to Ctrl group: \*  $p < 0.05$ .

**Fig. S3** Relative abundances of Firmicutes (A), Bacteroides (B), Proteobacteria (C), and F/B ratio (D). Data were presented as mean  $\pm$  SEM (n=8). Significant effect compared to Ctrl group: \*  $p < 0.05$ , \*\*  $p < 0.01$ .

**Fig. S4** Abundances of the families of *Muribaculaceae* (A), *Lachnospiraceae* (B), and the genera of *Odoribacter* (C), *uncultured\_bacterium\_f\_Ruminococcaceae* (D), and *Lachnospiraceae\_NK4A136\_group* (E). Data were presented as mean  $\pm$  SEM (n=8). Significant effect compared to the HFD group: #  $p < 0.05$ .

**Fig. S5** The permutation test of OPLS-DA analysis between Ctrl vs HFD (A), HFD vs CLP-F (B), and HFD vs CLP-G (C).

Fig. S1

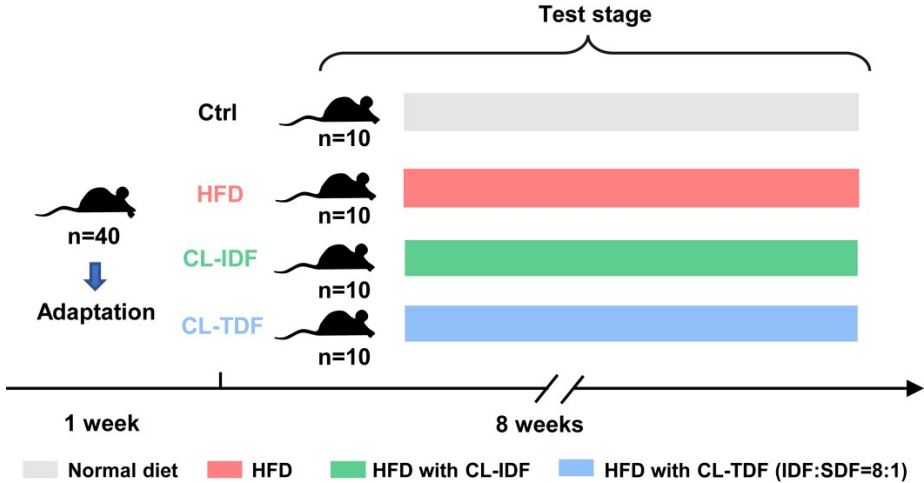

Fig. S2

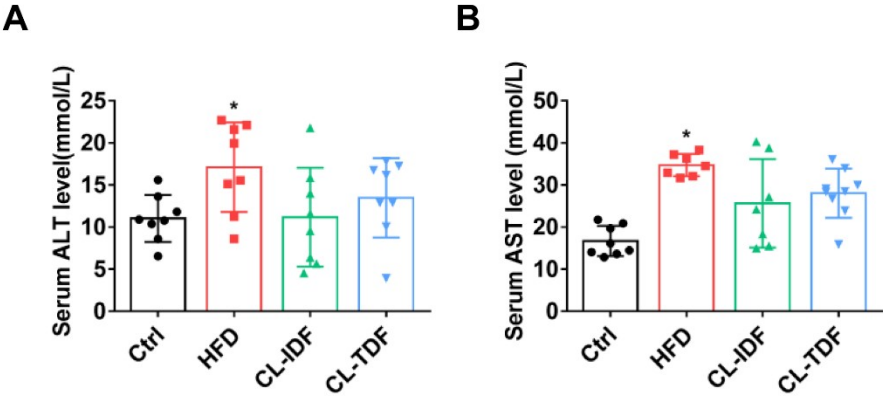

Fig. S3

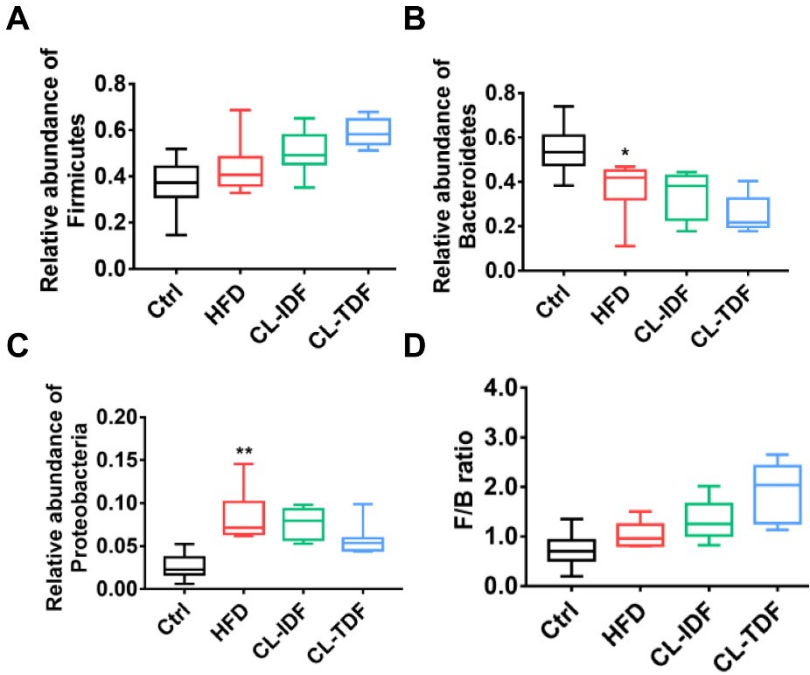

Fig. S4

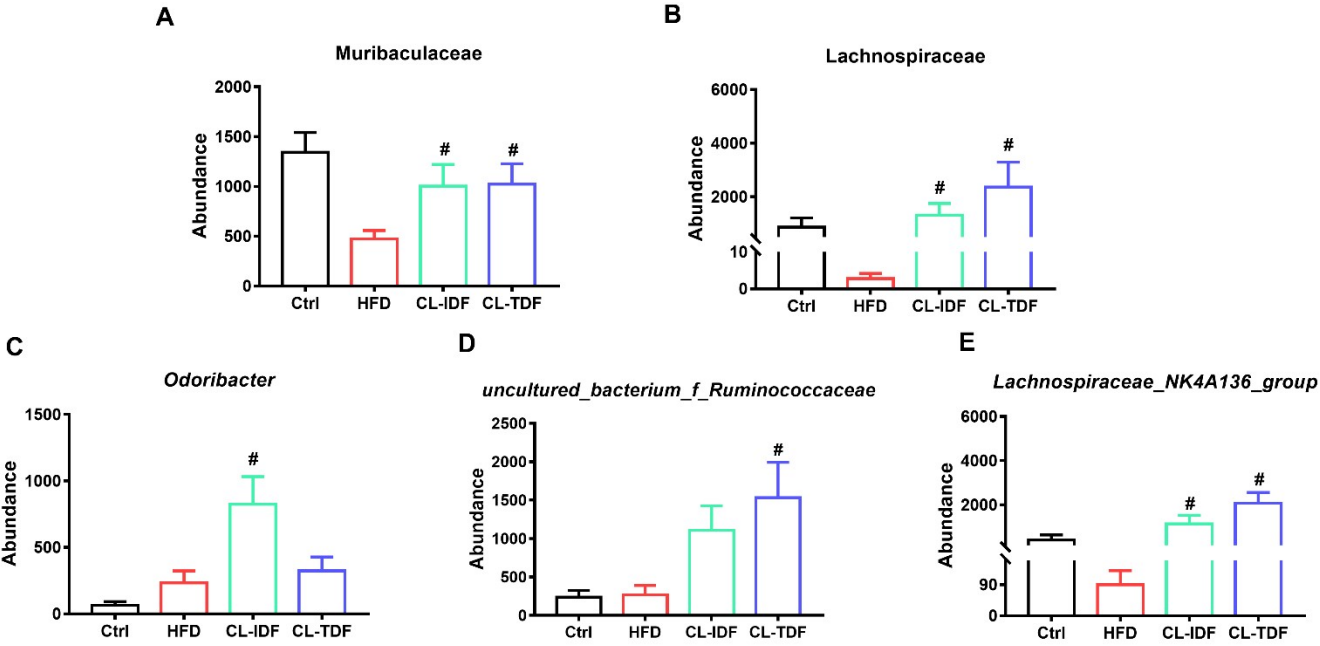

Fig. S5

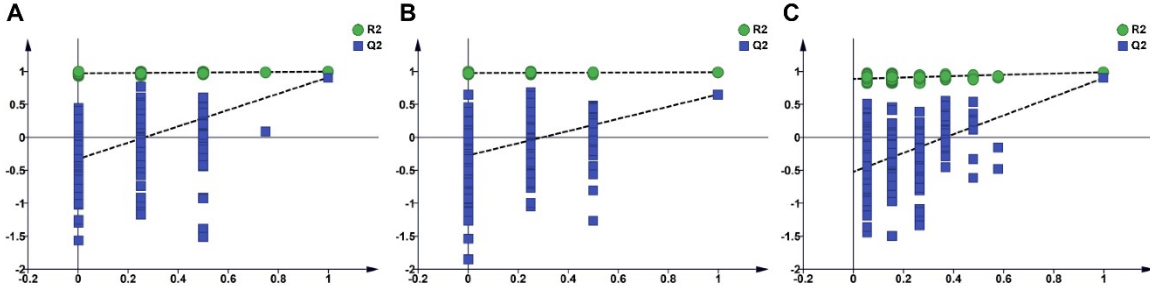

Supplement: d2fo01632j1.pdf [file d2fo01632j1.pdf]
